# Supplementary material for: Structural basis for interdomain communication in SHIP2 providing high phosphatase activity
Source: eLife. 2017 Aug 9;6:e26640. doi: 10.7554/eLife.26640 (PMC5550278; doi:10.7554/eLife.26640)
Supplement: Figure 2—figure supplement 1—source data 1. — DOI: http://dx.doi.org/10.7554/eLife.26640.009 [file elife-26640-fig2-figsupp1-data1.xlsx]

## Sheet: Sheet1
Figure 2-figure supplement 1-source data
PS (ng)		Ptase no Ca			Ptase +Ca			Ptase-C2 no Ca			Ptase-C2 +Ca
600	0.581778	0.407012	0.432197	0.418475	0.497735	0.339646	0.823907	0.883638	1.29245	1.1299	0.833676	0.965746
300	0.279632	0.219519	0.255267	0.248945	0.299036	0.2129	0.629525	0.731974	1.04482	1.06338	0.804348	0.815349
150	0.270156	0.127407	0.163315	0.103047	0.191273	0.0761721	0.460767	0.603355	0.634453	0.29172	0.405472	0.557905
75	0.0603079	0.0461249	0.0153275	0.0561509	0.0857057	0.0101327	0.28181	0.473739	0.401679	0.256017	0.20432	0.310863
37.5	0.0343417	0.0107006	0.0139037	0.0260505	0.0283752	0.0230512	0.0690694	0.385331	0.0868195	0.131232	0.0577258	0.117949
18.75	0.019795	0.0130253	0.0162815	0.011579	0.0150926	0.021605	0.00656599	0.064753	0.0121469	0.0146534	0.0136463	0.00418818
