# Supplementary material for: Structural basis for interdomain communication in SHIP2 providing high phosphatase activity
Source: eLife. 2017 Aug 9;6:e26640. doi: 10.7554/eLife.26640 (PMC5550278; doi:10.7554/eLife.26640)
Supplement: Figure 2—source data 1. — DOI: http://dx.doi.org/10.7554/eLife.26640.007 [file elife-26640-fig2-data1.xlsx]

## Sheet: Sheet1
Figure 2-source data
Figure 2C insert:
	Ptase	Ptase-C2
Protein (uM)	rel RU 10s	rel RU 10s
0.625	0.0791276	0.0895394
1.25	0.0742217	0.119796
2.5	0.144473	0.269847
5	0.364492	0.550934
10	0.715163	1
Figure 2D:
PS (ng)		Ptase (rel RU at 10s)			Ptase-C2 (rel RU at 10s)
-Ca	0.978304	1.019	1.00269	0.963719	1.02741	1.00887
+Ca	1.04324	1.03049	1.00463	1.17491	1.12226	1.10609
