# Supplementary material for: Structural basis for interdomain communication in SHIP2 providing high phosphatase activity
Source: eLife. 2017 Aug 9;6:e26640. doi: 10.7554/eLife.26640 (PMC5550278; doi:10.7554/eLife.26640)
Supplement: Figure 3—source data 1. — Values are in [PO4]*[E]−1*s−1. The values in red were excluded. Numbers (#i) above data indicate independent experiment number. Equation used to fit data in Figure 3A–F: Y = Bo + Vm*X/(X + Km); Variables: Vmax, Km, Bo = baseline. Software used: Graphpad Prism. DOI: http://dx.doi.org/10.7554/eLife.26640.011 [file elife-26640-fig3-data1.xlsx]

## Sheet: Sheet1
Figure 3-source data
Values are in [PO4]*[E]-1*s-1
The values in red were excluded
Numbers (#i) above data indicate independent experiment number
Equation used to fit data in figures 3A-F: Y=Bo + Vm*X/(X+Km); Variables: Vmax, Km, Bo=baseline. Software used: Graphpad Prism
Figure 3A
	Ptase (400 nM)																		Ptase-C2 (400 nM)
[IP4] (mM)		#1			#2			#3			#4			#5			#6			#1			#2			#3			#4			#5			#6			#7			#8
0.5	1.07138	0.928496	0.894489	0.965813	0.897951	0.97634	1.11334	0.862288	0.893411	0.87528	0.911594	0.816085	1.22145	1.15237	1.05353	1.11476	1.10818	0.987448	1.60345	1.45288	1.21459	1.46175	1.45247	1.41457	1.22492	1.31712	1.28912	1.40654	1.12454	1.23164	1.94963	1.66908	1.68876	1.73126	1.7146	1.89727	1.86522	1.62703	1.55844	1.33369	1.54681	1.50409
0.333333				0.93827	1.05525	0.943405	1.07689	0.840848	0.950832	0.938095	0.79417	0.840838	1.01112	0.937252	0.985713	0.975725	0.998986	0.775703				1.4874	1.43152	1.46944	1.35642	1.37457	1.35729	1.18345	1.31077	1.21327	1.69684	1.62271	1.68589	1.55721	1.4548	1.56992	1.34848	1.38233	1.26652	1.37724	1.38782	1.34295
0.222222				0.879874	1.00362	0.924313	1.02627	0.785645	0.872032	0.721795	0.769397	0.79772	0.965424	0.980507	0.903544	0.940512	1.0241	0.773555				1.17927	1.28938	1.23666	1.21664	1.15062	1.2207	1.22992	1.37123	1.30917	1.39949	1.43949	1.48084	1.4346	1.37155	1.73636	1.32653	1.19171	1.29031	1.15685	1.29676	1.14264
0.148148				0.840674	0.724939	0.819265	0.765394	0.72292	0.839727	0.70533	0.653705	0.659597	0.820046	0.881524	0.737069	0.901769	0.711691	0.823034				1.08528	1.0168	0.994564	1.15433	0.973287	1.04787	0.922907	1.05136	1.08835	1.22011	1.29894	1.31702	1.28756	1.24361	1.29495	1.35112	1.10318	1.21408	1.03343	1.1666	0.96611
0.125	0.680488	0.65566	0.603187																0.947024	0.927538	0.832395
0.098765				0.601484	0.538292	0.583837	0.621615	0.624878	0.643203	0.549418	0.516429	0.497895	0.655272	0.735058	0.580581	0.578079	0.566772	0.643313				0.962271	0.722546	1.02901	0.608367	0.86984	0.893683	0.666607	0.74148	0.792117	0.98172	0.873111	1.02277	0.985741	0.956117	0.973517	0.718089	0.888147	0.86554	0.715451	0.809736	0.703619
0.065844				0.447929	0.493059	0.521669	0.533646	0.445615	0.501478	0.380457	0.386902	0.369187	0.519534	0.50087	0.488135	0.467793	0.507503	0.54592				0.721186	0.493045	0.765171	0.577096	0.741648	0.694777	0.54857	0.504751	0.598576	0.636224	0.688056	0.831424	0.77476	0.863312	0.689894	0.880432	0.727089	0.687522	0.723709	0.635484	0.626492
0.0625	0.49024	0.581493	0.424696																0.540714	0.480133	0.494354
0.043896				0.396949	0.389842	0.373977	0.393479	0.374665	0.34103	0.235054	0.253525	0.249781	0.386649	0.36672	0.324462	0.331287	0.284734	0.358029				0.505988	0.479449	0.47365	0.47314	0.522151	0.579463	0.324827	0.331589	0.388253	0.432242	0.511814	0.601078	0.634217	0.494723	0.602283	0.328653	0.775249	0.43628	0.465018	0.395404	0.411678
0.03125	0.227093	0.325589	0.186384																0.38287	0.228289	0.26781
0.029264				0.195587	0.183257	0.189215	0.202509	0.180604	0.204257	0.114016	0.185402	0.201789	0.24317	0.206696	0.171543	0.241961	0.186822	0.194863				0.194437	0.261543	0.278829	0.282929	0.210218	0.15603	0.232559	0.220759	0.237133	0.404042	0.364246	0.365649	0.45593	0.384194	0.379797	0.324492	0.223679	0.336508	0.329559	0.233265	0.256725
0.0195093				0.0933212	0.088171	0.0877637	0.16119	0.0945115	0.139374	0.0993817	0.104721	0.100106	0.0870548	0.0747222	0.0801416	0.117154	0.104135	0.122043				0.139207	0.140237	0.159062	0.0844539	0.161275	0.118717	0.1175	0.173848	0.112233	0.148174	0.166235	0.200198	0.26285	0.226756	0.219896	0.110768	0.146029	0.176146	0.164021	0.130242	0.125334
0.015625	0.0974151	0.121745	0.123456																0.151223	0.0900474	0.118385
0.0130062				0.0671657	0.0891707	0.0697117	0.0580874	0.0483328	0.0618116	0.0420429	0.0492318	0.05152	0.0104603	0.0124199	0.0459707	-0.0201744	0.0305446	0.0242285				0.112982	0.114103	0.112787	0.130848	0.0555684	0.0503379	0.0828543	0.0386893	0.134548	0.0618516	0.0719652	0.100166	0.127393	0.181785	0.120762	0.0548996	0.0327052	0.0387066	0.0822951	0.103412	0.0552423
0.00867082				0.0425076	0.0682953	0.0241907	0.0396699	0.0359801	0.0346239	0.0404227	0.0388717	0.0562434	0.0165366	0.0011336	0.0066488	0.00693665	0.020444	0.0172415				0.0641314	0.0656143	0.0876486	0.0417458	0.0446464	0.0458215	-0.00564011	0.00444151	0.0117601	0.0925579	0.062362	0.0833003	0.125383	0.117285	0.140675	0.0592151	0.0402373	0.02349	0.107305	0.0983394	0.0453137
0	0.0463163	0.0232864	0.0223259	0.0124758	0.00741286	-0.00320772	-0.0153183	-0.0208048	-0.0015297	-0.0150153	-0.0149835	0.0143252	-0.0275671	-0.0182665	0.0537757	-0.013309	-0.0298285	-0.020088	0.00590457	0.0172367	0.0363736	0.0431078	0.0107838	0.0249025	-0.00999402	0.0032318	-0.00423362	-0.0580212	-0.0259405	-0.0646784	-0.0280151	-0.00816982	0.0143356	0.0475186	0.0583998	0.0558813	-0.0326188	-0.0404767	-0.0417402	0.00616484	-0.00063433	-0.00931816
Figure 3B
	Ptase (50 nM)			Ptase-C2 (50 nM)
[PIP3diC8] (mM)		#1			#1			#2			#3			#4			#5			#6			#7
0.222222	0.872143	1.40637	1.03871	5.78871	6.13727	5.57364	4.38485	4.24577	3.89601	4.39328	4.62826	4.47154	4.50736	5.01385	5.19604	4.93172	4.75521	5.04026	5.47454	4.93926	4.96692	6.48742	6.53687	5.58985
0.148148	1.0702	1.13926	1.2194	5.46355	4.97931	5.82297	3.99133	3.94423	3.1476	4.11504	4.48358	4.44558	4.1436	3.74202	4.8892	4.32366	4.18365	4.59901	5.04158	4.26147	4.3541	5.39642	5.77724	4.99393
0.098765	0.995976	1.26376	1.20105	4.59301	5.26219	3.91337	3.82521	3.35913	3.27043	3.84827	3.50856	3.23751	4.06583	4.19862	4.41393	3.61758	3.9398	3.28865	4.45754	3.86693	4.15979	4.70896	5.06958	4.74888
0.065844	0.753749	1.08564	0.895631	3.55569	3.32433	3.19348	2.62054	2.64192	2.79635	2.89047	3.27663	2.61025	2.98481	2.99985	3.23668	2.93853	2.94442	2.98402	3.06815	2.9938	2.72586	3.43534	3.9973	3.70843
0.043896	0.848456	0.959488	0.90852	2.8545	3.00765	2.90024	2.43528	2.41538	1.61002	2.21136	2.29407	1.66947	2.15245	1.99295	2.45804	2.26086	2.15266	2.30702	2.18259	2.11897	1.23401	2.75325	2.91458	2.45182
0.029264	0.510012	0.659643	0.640343	1.70802	1.93077	1.61081	1.09505	1.15771	1.06933	1.43389	1.60844	1.43966	1.00043	1.35337	0.99483	1.59518	1.44942	1.33685	1.42427	1.45368	1.12742	2.02708	2.06316	1.80564
0.0195093	0.398655	0.538901	0.395479	0.8351	1.13888	0.973263	0.606201	0.832547	0.841333	1.0874	1.18631	1.08913	0.33655	0.762623	0.756733	0.871403	0.904682	0.81098	0.938751	0.937453	1.13714	1.36893	1.07543	0.916106
0.0130062	0.410246	0.232412	0.323856	0.671906	0.631621	0.6309	0.504744	0.529828	0.693409	0.913633	0.714765	0.653437	0.723795	0.289615	0.488655	0.372752	0.571706	0.354972	0.463423	0.529834	0.529634	0.534111	0.532943	0.534744
0.00867082	0.192267	0.267588	0.641449	0.349631	0.360037	0.480067	0.2583	0.255284	0.465859	0.491306	0.546187	0.575068	0.403654	0.1607	0.444827	0.147235	0.444645	0.326318	0.393241	0.346254	0.397485	0.570149	0.521907	0.474736
0	0.0211123	-0.0643155	0.0432032	-0.0363124	0.0639358	0.171911	-0.100165	0.0431994	0.132425	0.0486355	0.125059	0.0720658	0.015891	0.104418	0.100861	0.151776	-0.285306	-0.238527	-0.16791	-0.16826	-0.0482203	-0.114555	0.233946	-0.104867
Figure 3C
	Ptase_FLDD (400 nM)			Ptase-C2_FLDD (400 nM)
[IP4] (mM)		#1			#1			#2
0.5	1.0046	0.796742	0.889009	1.16343	1.36758	1.24763	0.908517	0.877841	0.9158
0.333333	0.951792	0.920402	0.891108	0.962505	1.28334	1.19979	0.794718	0.902049	0.951369
0.222222	0.985979	0.794103	0.906341	1.18281	1.30635	0.79898	0.783319	1.07986	1.03298
0.148148	0.912302	0.746463	0.744443	1.02293	1.17411	1.03499	0.729289	0.938562	0.909497
0.098765	0.716228	0.587971	0.567053	0.82971	0.902938	0.849866	0.511115	0.712513	0.634839
0.065844	0.50441	0.406595	0.431027	0.681746	0.608972	0.718067	0.385778	0.487991	0.528361
0.043896	0.3309	0.373778	0.311413	0.470557	0.534308	0.46071	0.350292	0.478466	0.373817
0.029264	0.246103	0.30038	0.235236	0.411428	0.374441	0.400195	0.211102	0.195698	0.253821
0.0195093	0.132566	0.17459	0.135446	0.23094	0.2198	0.210519	0.12353	0.0875245	0.132394
0.0130062	0.0824544	0.0773409	0.0731498	0.111656	0.154505	0.132077	0.0656991	0.0326604	0.0634677
0.00867082	0.0699858	0.0971153	0.0519099	0.100919	0.105445	0.100876	0.0209309	0.0250229	0.0308271
0	-0.0102206	0.00988181	0.000338807	0.031454	0.0180227	0.0430009	-0.0414267	-0.0303623	-0.0206886
Figure 3D
	Ptase_FLDD (50 nM)			Ptase-C2_FLDD (50 nM)
[PIP3diC8] (mM)		#1			#1
0.222222	3.50272	3.12627	2.92942	3.12608	3.43908	3.15764
0.148148	3.17782	2.89622	2.98555	2.28383	2.17744	2.50185
0.098765	2.72382	2.79437	2.7448	2.04488	2.00547	2.2107
0.065844	2.06239	2.18088	2.33239	1.84556	2.22982	3.15742
0.043896	1.92613	1.87814	1.85827	1.04314	1.56361	1.302
0.029264	1.25329	1.18052	1.05457	0.461896	0.972237	1.1932
0.0195093	0.698093	0.969152	0.75604	0.350479	0.713019	0.650884
0.0130062	0.452583	0.497679	0.522513	0.163166	0.43248	0.483063
0.00867082	0.303331	0.482417	0.372107	0.384193	0.412336	0.340076
0	0.0345722	-0.035984	0.00141177	-0.0533399	0.0840032	-0.0306633
Figure 3E
	Ptase_R649A (400 nM)						Ptase-C2_R649A (400 nM)
[IP4] (mM)		#1			#2			#1			#2
0.5	1.02233	1.34462	1.25822	1.2378	1.09851	1.18289	1.44653	1.39382	1.35997	1.26436	1.19101	1.14985
0.333333	1.2273	1.31357	1.10127	1.02302	1.09852	1.12074	1.41778	1.26699	1.22582	1.22523	1.43291	1.15682
0.222222	1.07722	1.28627	0.915482	1.08506	1.00264	1.04967	1.33038	1.22194	1.09268	1.2325	1.27846	1.19734
0.148148	0.887762	0.998939	0.789426	0.80014	0.80713	0.788228	1.03483	1.03322	0.961512	0.936291	1.01201	0.97918
0.098765	0.685915	0.758103	0.653758	0.596236	0.636943	0.744757	0.861677	0.780878	0.780729	0.71555	0.732741	0.691795
0.065844	0.557865	0.494879	0.415976	0.446398	0.450802	0.523681	0.581303	0.558863	0.550709	0.56358	0.643115	0.558587
0.043896	0.231174	0.448748	0.357189	0.351059	0.380709	0.3608	0.421056	0.491904	0.444066	0.475627	0.420233	0.325711
0.029264	0.228585	0.285947	0.203962	0.228537	0.242727	0.222843	0.296953	0.271748	0.366686	0.264507	0.245798	0.230864
0.0195093	0.156375	0.158632	0.120051	0.123858	0.104644	0.087569	0.127747	0.129601	0.166767	0.118588	0.180153	0.107444
0.0130062	0.0963209	0.0785872	0.0836779	0.0341587	0.0710544	0.0591942	0.0879813	0.0749476	0.0850112	0.0375749	0.036253	0.102916
0.00867082	0.0766232	0.0730268	0.0710922	0.0333666	0.0695728	0.0510931	0.0666093	0.0641353	0.0807964	0.0585206	0.0507333	0.043391
0	0.00828308	0.0188676	0.0218935	-0.0193227	-0.0207781	-0.00894336	0.0286833	0.00234308	0.0145211	-0.0186421	-0.00963105	-0.0172744
Figure 3F
	Ptase_R649A (50 nM)						Ptase-C2_R649A (50 nM)
[PIP3diC8] (mM)		#1			#2			#1
0.222222	1.2422	1.24025	1.2874	1.38655	1.5831	1.40584	3.92795	4.92534	3.97198
0.148148	1.23656	1.08172	1.26693	1.1621	1.11656	1.07627	4.04589	3.40592	3.77954
0.098765	1.02753	1.11181	1.05964	1.12968	1.42717	1.25536	3.41366	3.1303	2.65279
0.065844	1.03497	0.9684	1.08426	1.06696	1.37908	1.27642	2.48445	2.28227	2.55502
0.043896	0.95705	0.931551	1.00595	0.889645	1.21511	0.907264	2.09266	1.58108	2.0468
0.029264	0.316509	0.384927	0.419088	0.63831	0.883439	0.660344	1.55503	1.42132	1.58248
0.0195093	0.18004	0.276585	0.268215	0.671796	0.887039	0.450664	0.907401	0.640143	0.863531
0.0130062	0.117042	0.27563	0.271834	0.219614	0.489085	0.279633	0.598935	0.275481	0.410751
0.00867082	0.23522	0.322665	0.237118	0.365969	0.476879	0.285585	0.584758	0.334995	0.554184
0	-0.0915832	-0.0806831	-0.0788339	0.0714968	0.0944148	0.0851887	0.088745	-0.0442649	-0.0444802
