# Supplementary material for: Structural basis for interdomain communication in SHIP2 providing high phosphatase activity
Source: eLife. 2017 Aug 9;6:e26640. doi: 10.7554/eLife.26640 (PMC5550278; doi:10.7554/eLife.26640)
Supplement: Figure 4—source data 1. — Values are in [PO4]*[E]−1*s−1. The values in red were excluded. Numbers (#i) above data indicate independent experiment number. p-Values are calculated using a two-tailed unpaired Student t test assuming Gaussian distribution. Exact p-values are shown if >0.001. DOI: http://dx.doi.org/10.7554/eLife.26640.015 [file elife-26640-fig4-data1.xlsx]

## Sheet: Sheet1
Figure 4-source data
Values are in [PO4]*[E]-1*s-1
The values in red were excluded
Numbers (#i) above data indicate independent experiment number
Figure 4A							Statistical unpaired t-test analysis for figure 4A
IP4 (150 uM)
		#1							⎯ vs PC	PC vs PS
Ptase	1.04552	1.17411	1.16521	Ptase (400 nM)			Ptase
Ptase+PC	1.01229	0.918067	1.01708				p value		ns= 0.0500	❋= 0.0399
Ptase+PS	0.838777	0.909575	0.825334				95% confidence interval of difference		0.0005603 to 14.00	0.4508 to 11.51
Ptase-C2	1.25938	1.25401	1.1217	Ptase-C2 (400 nM)
Ptase-C2+PC	1.32559	1.15959	1.2418				Ptase-C2
Ptase-C2+PS	1.11356	1.2303	1.1692				p value		ns= 0.6656	ns= 0.2905
							95% confidence interval of difference		-10.23 to 7.292	-4.384 to 11.23
Figure 4B
PIP3diC8 (150 uM)
		#1			#2			#3			#4			#5			#6			#7
Ptase	0.49861	0.400814	0.470287	0.472998	0.525098																	Ptase (400 nM)
Ptase+PC	0.604332	0.517411	0.527026	0.476334	0.508013	0.42294
Ptase+PS	0.683795	0.652424	0.72175	0.687033	0.768041	0.690056
Ptase-C2	5.46355	4.97931	5.82297	3.99133	3.94423	3.1476	4.11504	4.48358	4.44558	4.1436	3.74202	4.8892	4.32366	4.18365	4.59901	5.04158	4.26147	4.3541	5.39642	5.77724	4.99393	Ptase-C2 (50 nM)
Ptase-C2+PC	3.68498	4.46408	3.3147	4.44866	4.42531	4.01839
Ptase-C2+PS	5.04206	5.24571	5.18813	6.41433	6.69886	4.92748
Statistical unpaired t-test analysis for figure 4B
		⎯ vs PC	PC vs PS
Ptase
p value		ns= 0.3048	❋❋❋❋
95% confidence interval of difference		-5.288 to 1.853	-12.32 to -6.037
Ptase-C2
p value		ns= 0.0977	❋❋ = 0.0020
95% confidence interval of difference		-0.6116 to 6.813	-14.09 to -4.234
Figure 4C
	Ptase (400 nM)						Ptase-C2 (250 nM)
[PIP3diC16] (mM)		DPPC			DPPS			DPPC			DPPS
0.099	0.35011	0.227139	0.327493	0.681613	0.750144	0.679319	0.866624	0.492843	0.518112	1.76813	1.62681	1.50263
0.066	0.260632	0.171312	0.262298	0.618252	0.502029	0.491052	0.533319	0.571158	0.370602	1.28227	1.0488	1.12319
0.044	0.155942	0.165653	0.16356	0.36992	0.347219	0.315439	0.444677	0.33179	0.294582	0.862022	0.768498	0.787776
0.0293333	0.163323	0.0690004	0.145741	0.234248	0.209712	0.306465	0.364118	0.257358	0.283761	0.64174	0.57063	0.783884
0.0195556	0.158976	0.0910608	0.11924	0.220961	0.238026	0.182047	0.20136	0.217765	0.232918	0.36753	0.36234	0.420437
0.013037	0.0693007	0.0678034	0.068668	0.131104	0.143018	0.146756	0.162797	0.151718	0.178376	0.319138	0.277268	0.289889
0.00869136	0.054989	0.0612997	0.044893	0.115628	0.0867586	0.601899	0.132993	0.125604	0.133402	0.206593	0.17904	0.19254
0	0.00279948	0.00583092	-0.0086304	0.000551812	-0.011226	0.0106742	0.0156527	-0.018752	0.00309929	-0.00274703	-0.0181895	0.0209365
Figure 4D
	Ptase_FLDD (400 nM)						Ptase-C2_FLDD (400 nM)
[PIP3diC16] (mM)		DPPC			DPPS			DPPC			DPPS
0.099	0.182714	0.503915	0.26656	1.25306	0.968919	0.992296	0.31312	0.477873	0.359506	0.819643	0.894687	0.922902
0.066	0.146991	0.326591	0.153968	0.789292	0.64896	0.673381	0.191822	0.323371	0.237992	0.701227	0.631651	0.620687
0.044	0.126788	0.198269	0.127759	0.481037	0.494862	0.427605	0.141564	0.158542	0.163334	0.339035	0.447958	0.388478
0.0293333	0.0832205	0.113636	0.0967964	0.429592	0.292308	0.309342	0.0635264	0.139781	0.134098	0.247284	0.290456	0.294171
0.0195556	0.10168	0.125046	0.100026	0.250242	0.250086	0.242316	0.0765828	0.108233	0.126171	0.210079	0.225502	0.2434
0.013037	0.0279168	0.088675	0.0771694	0.187284	0.175091	0.194122	0.0624229	0.0599542	0.0804778	0.163397	0.153558	0.178005
0.00869136	0.0574343	0.0729305	0.0746844	0.134707	0.156247	0.163451	0.0452898	0.0604277	0.0736676	0.114974	0.116838	0.117391
0	0.00508769	-0.0164915	0.0114038	0.00261045	-0.0104603	0.00784985	0.000654038	-0.00791637	0.00726234	0.00523812	-0.00772812	0.00249
