# Supplementary material for: Structural basis for interdomain communication in SHIP2 providing high phosphatase activity
Source: eLife. 2017 Aug 9;6:e26640. doi: 10.7554/eLife.26640 (PMC5550278; doi:10.7554/eLife.26640)
Supplement: Figure 7—source data 1. — Values are in [PO4]*[E]−1*s−1. The values in red were excluded. Numbers (#i) above data indicate independent experiment number. Equation used to fit data in Figure 3A–F: Y = Bo + Vm*X/(X + Km); Variables: Vmax, Km, Bo = baseline. Software used: Graphpad Prism. DOI: http://dx.doi.org/10.7554/eLife.26640.025 [file elife-26640-fig7-data1.xlsx]

## Sheet: Sheet1
Figure 7-source data
Values are in [PO4]*[E]-1*s-1
The values in red were excluded
Numbers (#i) above data indicate independent experiment number
Equation used to fit data in figures 3A-F: Y=Bo + Vm*X/(X+Km); Variables: Vmax, Km, Bo=baseline. Software used: Graphpad Prism
Figure 7B
	Ptase (400 nM)																		Ptase-C2 (400 nM)																								Ptase-C2_D613A//D615A (400 nM)
[IP4] (mM)		#1			#2			#3			#4			#5			#6			#1			#2			#3			#4			#5			#6			#7			#8			#1
0.5	1.07138	0.928496	0.894489	0.965813	0.897951	0.97634	1.11334	0.862288	0.893411	0.87528	0.911594	0.816085	1.22145	1.15237	1.05353	1.11476	1.10818	0.987448	1.60345	1.45288	1.21459	1.46175	1.45247	1.41457	1.22492	1.31712	1.28912	1.40654	1.12454	1.23164	1.94963	1.66908	1.68876	1.73126	1.7146	1.89727	1.86522	1.62703	1.55844	1.33369	1.54681	1.50409	1.13556	1.06228	1.17165
0.333333				0.93827	1.05525	0.943405	1.07689	0.840848	0.950832	0.938095	0.79417	0.840838	1.01112	0.937252	0.985713	0.975725	0.998986	0.775703				1.4874	1.43152	1.46944	1.35642	1.37457	1.35729	1.18345	1.31077	1.21327	1.69684	1.62271	1.68589	1.55721	1.4548	1.56992	1.34848	1.38233	1.26652	1.37724	1.38782	1.34295	1.01716	1.0537	0.902846
0.222222				0.879874	1.00362	0.924313	1.02627	0.785645	0.872032	0.721795	0.769397	0.79772	0.965424	0.980507	0.903544	0.940512	1.0241	0.773555				1.17927	1.28938	1.23666	1.21664	1.15062	1.2207	1.22992	1.37123	1.30917	1.39949	1.43949	1.48084	1.4346	1.37155	1.73636	1.32653	1.19171	1.29031	1.15685	1.29676	1.14264	1.1095	1.13404	1.10757
0.148148				0.840674	0.724939	0.819265	0.765394	0.72292	0.839727	0.70533	0.653705	0.659597	0.820046	0.881524	0.737069	0.901769	0.711691	0.823034				1.08528	1.0168	0.994564	1.15433	0.973287	1.04787	0.922907	1.05136	1.08835	1.22011	1.29894	1.31702	1.28756	1.24361	1.29495	1.35112	1.10318	1.21408	1.03343	1.1666	0.96611	1.03956	0.906922	0.981755
0.125	0.680488	0.65566	0.603187																0.947024	0.927538	0.832395
0.098765				0.601484	0.538292	0.583837	0.621615	0.624878	0.643203	0.549418	0.516429	0.497895	0.655272	0.735058	0.580581	0.578079	0.566772	0.643313				0.962271	0.722546	1.02901	0.608367	0.86984	0.893683	0.666607	0.74148	0.792117	0.98172	0.873111	1.02277	0.985741	0.956117	0.973517	0.718089	0.888147	0.86554	0.715451	0.809736	0.703619	0.779992	0.773905	0.821576
0.065844				0.447929	0.493059	0.521669	0.533646	0.445615	0.501478	0.380457	0.386902	0.369187	0.519534	0.50087	0.488135	0.467793	0.507503	0.54592				0.721186	0.493045	0.765171	0.577096	0.741648	0.694777	0.54857	0.504751	0.598576	0.636224	0.688056	0.831424	0.77476	0.863312	0.689894	0.880432	0.727089	0.687522	0.723709	0.635484	0.626492	0.559807	0.50968	0.566402
0.0625	0.49024	0.581493	0.424696																0.540714	0.480133	0.494354
0.043896				0.396949	0.389842	0.373977	0.393479	0.374665	0.34103	0.235054	0.253525	0.249781	0.386649	0.36672	0.324462	0.331287	0.284734	0.358029				0.505988	0.479449	0.47365	0.47314	0.522151	0.579463	0.324827	0.331589	0.388253	0.432242	0.511814	0.601078	0.634217	0.494723	0.602283	0.328653	0.775249	0.43628	0.465018	0.395404	0.411678	0.436734	0.361999	0.40066
0.03125	0.227093	0.325589	0.186384																0.38287	0.228289	0.26781
0.029264				0.195587	0.183257	0.189215	0.202509	0.180604	0.204257	0.114016	0.185402	0.201789	0.24317	0.206696	0.171543	0.241961	0.186822	0.194863				0.194437	0.261543	0.278829	0.282929	0.210218	0.15603	0.232559	0.220759	0.237133	0.404042	0.364246	0.365649	0.45593	0.384194	0.379797	0.324492	0.223679	0.336508	0.329559	0.233265	0.256725	0.341622	0.357505	0.28979
0.0195093				0.0933212	0.088171	0.0877637	0.16119	0.0945115	0.139374	0.0993817	0.104721	0.100106	0.0870548	0.0747222	0.0801416	0.117154	0.104135	0.122043				0.139207	0.140237	0.159062	0.0844539	0.161275	0.118717	0.1175	0.173848	0.112233	0.148174	0.166235	0.200198	0.26285	0.226756	0.219896	0.110768	0.146029	0.176146	0.164021	0.130242	0.125334	0.124184	0.145292	0.152646
0.015625	0.0974151	0.121745	0.123456																0.151223	0.0900474	0.118385
0.0130062				0.0671657	0.0891707	0.0697117	0.0580874	0.0483328	0.0618116	0.0420429	0.0492318	0.05152	0.0104603	0.0124199	0.0459707	-0.0201744	0.0305446	0.0242285				0.112982	0.114103	0.112787	0.130848	0.0555684	0.0503379	0.0828543	0.0386893	0.134548	0.0618516	0.0719652	0.100166	0.127393	0.181785	0.120762	0.0548996	0.0327052	0.0387066	0.0822951	0.103412	0.0552423	0.100127	0.0869776	0.120289
0.00867082				0.0425076	0.0682953	0.0241907	0.0396699	0.0359801	0.0346239	0.0404227	0.0388717	0.0562434	0.0165366	0.0011336	0.0066488	0.00693665	0.020444	0.0172415				0.0641314	0.0656143	0.0876486	0.0417458	0.0446464	0.0458215	-0.00564011	0.00444151	0.0117601	0.0925579	0.062362	0.0833003	0.125383	0.117285	0.140675	0.0592151	0.0402373	0.02349	0.107305	0.0983394	0.0453137	0.0211833	0.0444624	0.0531521
0	0.0463163	0.0232864	0.0223259	0.0124758	0.00741286	-0.00320772	-0.0153183	-0.0208048	-0.0015297	-0.0150153	-0.0149835	0.0143252	-0.0275671	-0.0182665	0.0537757	-0.013309	-0.0298285	-0.020088	0.00590457	0.0172367	0.0363736	0.0431078	0.0107838	0.0249025	-0.00999402	0.0032318	-0.00423362	-0.0580212	-0.0259405	-0.0646784	-0.0280151	-0.00816982	0.0143356	0.0475186	0.0583998	0.0558813	-0.0326188	-0.0404767	-0.0417402	0.00616484	-0.00063433	-0.00931816	-0.0123492	0.00268552	0.00966367
Figure 7C
	Ptase (50 nM)			Ptase-C2 (50 nM)																					Ptase-C2_D613A//D615A (400 nM)
[PIP3diC8] (mM)		#1			#1			#2			#3			#4			#5			#6			#7			#1
0.222222	0.872143	1.40637	1.03871	5.78871	6.13727	5.57364	4.38485	4.24577	3.89601	4.39328	4.62826	4.47154	4.50736	5.01385	5.19604	4.93172	4.75521	5.04026	5.47454	4.93926	4.96692	6.48742	6.53687	5.58985	5.01719	6.04337	4.54256
0.148148	1.0702	1.13926	1.2194	5.46355	4.97931	5.82297	3.99133	3.94423	3.1476	4.11504	4.48358	4.44558	4.1436	3.74202	4.8892	4.32366	4.18365	4.59901	5.04158	4.26147	4.3541	5.39642	5.77724	4.99393	3.72471	3.70392	3.53525
0.098765	0.995976	1.26376	1.20105	4.59301	5.26219	3.91337	3.82521	3.35913	3.27043	3.84827	3.50856	3.23751	4.06583	4.19862	4.41393	3.61758	3.9398	3.28865	4.45754	3.86693	4.15979	4.70896	5.06958	4.74888	3.69399	4.00793	3.61036
0.065844	0.753749	1.08564	0.895631	3.55569	3.32433	3.19348	2.62054	2.64192	2.79635	2.89047	3.27663	2.61025	2.98481	2.99985	3.23668	2.93853	2.94442	2.98402	3.06815	2.9938	2.72586	3.43534	3.9973	3.70843	2.70622	2.92455	2.90211
0.043896	0.848456	0.959488	0.90852	2.8545	3.00765	2.90024	2.43528	2.41538	1.61002	2.21136	2.29407	1.66947	2.15245	1.99295	2.45804	2.26086	2.15266	2.30702	2.18259	2.11897	1.23401	2.75325	2.91458	2.45182	2.14778	2.34352	2.15406
0.029264	0.510012	0.659643	0.640343	1.70802	1.93077	1.61081	1.09505	1.15771	1.06933	1.43389	1.60844	1.43966	1.00043	1.35337	0.99483	1.59518	1.44942	1.33685	1.42427	1.45368	1.12742	2.02708	2.06316	1.80564	1.56327	1.5917	1.73579
0.0195093	0.398655	0.538901	0.395479	0.8351	1.13888	0.973263	0.606201	0.832547	0.841333	1.0874	1.18631	1.08913	0.33655	0.762623	0.756733	0.871403	0.904682	0.81098	0.938751	0.937453	1.13714	1.36893	1.07543	0.916106	1.78773	1.03081	0.942549
0.0130062	0.410246	0.232412	0.323856	0.671906	0.631621	0.6309	0.504744	0.529828	0.693409	0.913633	0.714765	0.653437	0.723795	0.289615	0.488655	0.372752	0.571706	0.354972	0.463423	0.529834	0.529634	0.534111	0.532943	0.534744	0.776889	0.765352	0.676949
0.00867082	0.192267	0.267588	0.641449	0.349631	0.360037	0.480067	0.2583	0.255284	0.465859	0.491306	0.546187	0.575068	0.403654	0.1607	0.444827	0.147235	0.444645	0.326318	0.393241	0.346254	0.397485	0.570149	0.521907	0.474736	0.72725	0.438091	0.439454
0	0.0211123	-0.0643155	0.0432032	-0.0363124	0.0639358	0.171911	-0.100165	0.0431994	0.132425	0.0486355	0.125059	0.0720658	0.015891	0.104418	0.100861	0.151776	-0.285306	-0.238527	-0.16791	-0.16826	-0.0482203	-0.114555	0.233946	-0.104867	-0.00900581	-0.0277963	0.0368021
Figure 7D
	Ptase (400 nM)																		Ptase-C2 (400 nM)																								Ptase_R665A (400 nM)						Ptase-C2_R665A (400 nM)
[IP4] (mM)		#1			#2			#3			#4			#5			#6			#1			#2			#3			#4			#5			#6			#7			#8			#1			#2
0.5	1.07138	0.928496	0.894489	0.965813	0.897951	0.97634	1.11334	0.862288	0.893411	0.87528	0.911594	0.816085	1.22145	1.15237	1.05353	1.11476	1.10818	0.987448	1.60345	1.45288	1.21459	1.46175	1.45247	1.41457	1.22492	1.31712	1.28912	1.40654	1.12454	1.23164	1.94963	1.66908	1.68876	1.73126	1.7146	1.89727	1.86522	1.62703	1.55844	1.33369	1.54681	1.50409	0.276404	0.368145	0.184403	0.354981	0.414507	0.324013	1.71062
0.333333				0.93827	1.05525	0.943405	1.07689	0.840848	0.950832	0.938095	0.79417	0.840838	1.01112	0.937252	0.985713	0.975725	0.998986	0.775703				1.4874	1.43152	1.46944	1.35642	1.37457	1.35729	1.18345	1.31077	1.21327	1.69684	1.62271	1.68589	1.55721	1.4548	1.56992	1.34848	1.38233	1.26652	1.37724	1.38782	1.34295	0.393393	0.407363	0.434191	0.311283	0.299791	0.339257	1.93172
0.222222				0.879874	1.00362	0.924313	1.02627	0.785645	0.872032	0.721795	0.769397	0.79772	0.965424	0.980507	0.903544	0.940512	1.0241	0.773555				1.17927	1.28938	1.23666	1.21664	1.15062	1.2207	1.22992	1.37123	1.30917	1.39949	1.43949	1.48084	1.4346	1.37155	1.73636	1.32653	1.19171	1.29031	1.15685	1.29676	1.14264	0.409946	0.347259	0.345634	0.307453	0.293279	0.315837	1.4072
0.148148				0.840674	0.724939	0.819265	0.765394	0.72292	0.839727	0.70533	0.653705	0.659597	0.820046	0.881524	0.737069	0.901769	0.711691	0.823034				1.08528	1.0168	0.994564	1.15433	0.973287	1.04787	0.922907	1.05136	1.08835	1.22011	1.29894	1.31702	1.28756	1.24361	1.29495	1.35112	1.10318	1.21408	1.03343	1.1666	0.96611	0.352702	0.349426	0.313997	0.271971	0.231425	0.239751	1.75769
0.125	0.680488	0.65566	0.603187																0.947024	0.927538	0.832395
0.098765				0.601484	0.538292	0.583837	0.621615	0.624878	0.643203	0.549418	0.516429	0.497895	0.655272	0.735058	0.580581	0.578079	0.566772	0.643313				0.962271	0.722546	1.02901	0.608367	0.86984	0.893683	0.666607	0.74148	0.792117	0.98172	0.873111	1.02277	0.985741	0.956117	0.973517	0.718089	0.888147	0.86554	0.715451	0.809736	0.703619	0.240563	0.245762	0.220673	0.246636	0.195773	0.210742	1.48849
0.065844				0.447929	0.493059	0.521669	0.533646	0.445615	0.501478	0.380457	0.386902	0.369187	0.519534	0.50087	0.488135	0.467793	0.507503	0.54592				0.721186	0.493045	0.765171	0.577096	0.741648	0.694777	0.54857	0.504751	0.598576	0.636224	0.688056	0.831424	0.77476	0.863312	0.689894	0.880432	0.727089	0.687522	0.723709	0.635484	0.626492	0.145596	0.170185	0.169173	0.210266	0.140525	0.15613	1.17918
0.0625	0.49024	0.581493	0.424696																0.540714	0.480133	0.494354
0.043896				0.396949	0.389842	0.373977	0.393479	0.374665	0.34103	0.235054	0.253525	0.249781	0.386649	0.36672	0.324462	0.331287	0.284734	0.358029				0.505988	0.479449	0.47365	0.47314	0.522151	0.579463	0.324827	0.331589	0.388253	0.432242	0.511814	0.601078	0.634217	0.494723	0.602283	0.328653	0.775249	0.43628	0.465018	0.395404	0.411678	0.102499	0.096737	0.077435	0.114194	0.110221	0.104507	0.592381
0.03125	0.227093	0.325589	0.186384																0.38287	0.228289	0.26781
0.029264				0.195587	0.183257	0.189215	0.202509	0.180604	0.204257	0.114016	0.185402	0.201789	0.24317	0.206696	0.171543	0.241961	0.186822	0.194863				0.194437	0.261543	0.278829	0.282929	0.210218	0.15603	0.232559	0.220759	0.237133	0.404042	0.364246	0.365649	0.45593	0.384194	0.379797	0.324492	0.223679	0.336508	0.329559	0.233265	0.256725	0.0272535	0.0346024	0.0197401	0.0915499	0.0669703	0.0873992	0.344639
0.0195093				0.0933212	0.088171	0.0877637	0.16119	0.0945115	0.139374	0.0993817	0.104721	0.100106	0.0870548	0.0747222	0.0801416	0.117154	0.104135	0.122043				0.139207	0.140237	0.159062	0.0844539	0.161275	0.118717	0.1175	0.173848	0.112233	0.148174	0.166235	0.200198	0.26285	0.226756	0.219896	0.110768	0.146029	0.176146	0.164021	0.130242	0.125334	0.0533558	0.0169084	0.0108939	0.0519106	0.0554447	0.0647566	0.152854
0.015625	0.0974151	0.121745	0.123456																0.151223	0.0900474	0.118385
0.0130062				0.0671657	0.0891707	0.0697117	0.0580874	0.0483328	0.0618116	0.0420429	0.0492318	0.05152	0.0104603	0.0124199	0.0459707	-0.0201744	0.0305446	0.0242285				0.112982	0.114103	0.112787	0.130848	0.0555684	0.0503379	0.0828543	0.0386893	0.134548	0.0618516	0.0719652	0.100166	0.127393	0.181785	0.120762	0.0548996	0.0327052	0.0387066	0.0822951	0.103412	0.0552423	-0.0173666	0.017038	0.0148435	0.0364023	0.0344637	0.0324106	0.0971645
0.00867082				0.0425076	0.0682953	0.0241907	0.0396699	0.0359801	0.0346239	0.0404227	0.0388717	0.0562434	0.0165366	0.0011336	0.0066488	0.00693665	0.020444	0.0172415				0.0641314	0.0656143	0.0876486	0.0417458	0.0446464	0.0458215	-0.00564011	0.00444151	0.0117601	0.0925579	0.062362	0.0833003	0.125383	0.117285	0.140675	0.0592151	0.0402373	0.02349	0.107305	0.0983394	0.0453137	0.0020324	-0.0144363	-0.00724546	0.0413926	0.0384115	0.0450093	0.0645581
0	0.0463163	0.0232864	0.0223259	0.0124758	0.00741286	-0.00320772	-0.0153183	-0.0208048	-0.0015297	-0.0150153	-0.0149835	0.0143252	-0.0275671	-0.0182665	0.0537757	-0.013309	-0.0298285	-0.020088	0.00590457	0.0172367	0.0363736	0.0431078	0.0107838	0.0249025	-0.00999402	0.0032318	-0.00423362	-0.0580212	-0.0259405	-0.0646784	-0.0280151	-0.00816982	0.0143356	0.0475186	0.0583998	0.0558813	-0.0326188	-0.0404767	-0.0417402	0.00616484	-0.00063433	-0.00931816	-0.0425882	-0.0370986	-0.019909	0.0328447	0.0223251	0.0444258	-0.00201441
Figure 7E
	Ptase (50 nM)			Ptase-C2 (50 nM)																					Ptase_D665A (50 nM)			Ptase-C2_D665A (50 nM)
[PIP3diC8] (mM)		#1			#1			#2			#3			#4			#5			#6			#7			#1			#1			#2
0.222222	0.872143	1.40637	1.03871	5.78871	6.13727	5.57364	4.38485	4.24577	3.89601	4.39328	4.62826	4.47154	4.50736	5.01385	5.19604	4.93172	4.75521	5.04026	5.47454	4.93926	4.96692	6.48742	6.53687	5.58985	0.918065	0.603127	0.839719	4.21863	4.39658	4.32529	4.29519	4.38392	4.49472
0.148148	1.0702	1.13926	1.2194	5.46355	4.97931	5.82297	3.99133	3.94423	3.1476	4.11504	4.48358	4.44558	4.1436	3.74202	4.8892	4.32366	4.18365	4.59901	5.04158	4.26147	4.3541	5.39642	5.77724	4.99393	0.62051	0.646398	0.768053	4.1803	4.01146	3.78828	4.1373	3.53181	3.65944
0.098765	0.995976	1.26376	1.20105	4.59301	5.26219	3.91337	3.82521	3.35913	3.27043	3.84827	3.50856	3.23751	4.06583	4.19862	4.41393	3.61758	3.9398	3.28865	4.45754	3.86693	4.15979	4.70896	5.06958	4.74888	0.937697	0.930398	0.886311	2.55658	2.7622	2.08014	3.20419	3.26631	3.31504
0.065844	0.753749	1.08564	0.895631	3.55569	3.32433	3.19348	2.62054	2.64192	2.79635	2.89047	3.27663	2.61025	2.98481	2.99985	3.23668	2.93853	2.94442	2.98402	3.06815	2.9938	2.72586	3.43534	3.9973	3.70843	0.660373	0.45541	0.672442	2.09578	2.23145	3.03403	2.2592	2.35458	2.53753
0.043896	0.848456	0.959488	0.90852	2.8545	3.00765	2.90024	2.43528	2.41538	1.61002	2.21136	2.29407	1.66947	2.15245	1.99295	2.45804	2.26086	2.15266	2.30702	2.18259	2.11897	1.23401	2.75325	2.91458	2.45182	0.676615	0.545617	0.597442	1.91701	1.59128	2.21055	1.75868	1.68747	1.9692
0.029264	0.510012	0.659643	0.640343	1.70802	1.93077	1.61081	1.09505	1.15771	1.06933	1.43389	1.60844	1.43966	1.00043	1.35337	0.99483	1.59518	1.44942	1.33685	1.42427	1.45368	1.12742	2.02708	2.06316	1.80564	0.427946	0.220063	0.437776	1.16831	1.22631	1.85928	1.25707	1.38315	1.2284
0.0195093	0.398655	0.538901	0.395479	0.8351	1.13888	0.973263	0.606201	0.832547	0.841333	1.0874	1.18631	1.08913	0.33655	0.762623	0.756733	0.871403	0.904682	0.81098	0.938751	0.937453	1.13714	1.36893	1.07543	0.916106	0.41537	0.334981	0.242037	0.619323	0.82947	0.758288	0.680167	0.557281	0.541452
0.0130062	0.410246	0.232412	0.323856	0.671906	0.631621	0.6309	0.504744	0.529828	0.693409	0.913633	0.714765	0.653437	0.723795	0.289615	0.488655	0.372752	0.571706	0.354972	0.463423	0.529834	0.529634	0.534111	0.532943	0.534744	0.182347	0.174124	0.0743673	0.302314	0.381325	0.478209	0.33846	0.244087	0.287728
0.00867082	0.192267	0.267588	0.641449	0.349631	0.360037	0.480067	0.2583	0.255284	0.465859	0.491306	0.546187	0.575068	0.403654	0.1607	0.444827	0.147235	0.444645	0.326318	0.393241	0.346254	0.397485	0.570149	0.521907	0.474736	0.358726	0.255563	0.193665	0.259933	0.347442	0.391841	0.31192	0.255995	0.3269
0	0.0211123	-0.0643155	0.0432032	-0.0363124	0.0639358	0.171911	-0.100165	0.0431994	0.132425	0.0486355	0.125059	0.0720658	0.015891	0.104418	0.100861	0.151776	-0.285306	-0.238527	-0.16791	-0.16826	-0.0482203	-0.114555	0.233946	-0.104867	0.0143066	-0.0108516	-0.00345494	0.23018	-0.0781901	0.0736	-0.065726	-0.0885955	-0.0712687
[truncated: 5 more columns]
