# Supplementary material for: Structural basis for interdomain communication in SHIP2 providing high phosphatase activity
Source: eLife. 2017 Aug 9;6:e26640. doi: 10.7554/eLife.26640 (PMC5550278; doi:10.7554/eLife.26640)
Supplement: Figure 8—figure supplement 1—source data 1. — Values are SHIP2/Vinculin intensities, scaled relative to wild type-SHIP2 (WT).The values in red were excluded. Numbers (#i) above data indicate independent experiment number. p-Values are calculated using a two-tailed unpaired Student t test assuming Gaussian distribution. Exact p-values are shown. DOI: http://dx.doi.org/10.7554/eLife.26640.032 [file elife-26640-fig8-figsupp1-data1.xlsx]

## Sheet: Sheet1
Figure 8-figure supplement 1-source data
The values in red were excluded
Numbers (#i) above data indicate independent experiment number
SHIP2		#1			#2			#3			#4			#5			#6			#7			#8
WT	1	1	1	0.919103	1.00509	1.0758	1.01593	0.96777	1.0163	2.0105	0.625462	0.364036	0.815372	1.32695	0.857676	1.08436	0.928973	0.986663	0.871497	1.06172	1.06678	0.899156	1.01928	1.08156
FLDD	0.45856	0.74357	1.10843	1.05553	1.05771	0.621956	0.895204	0.720689	0.925644	2.19669	1.11541	1.35792	0.944924	1.33598	0.8771	0.711235	1.0521	1.22346	0.693185	1.27747	1.92322	1.34961	1.52835	1.89473
DC2	0.649846	1.1293	1.23611	0.801702	1.01126	0.908558	0.688753	0.755361	1.50467	1.26176	0.701716	1.03541	0.713167	0.499188	1.30635	0.694805	0.874175	0.687433	0.783571	1.33712	1.18165	0.948162	0.899769	1.29164
Statistical unpaired t-test analysis for figure Figure 8 - figure supplement 1-source data
Contructs compaired		WT vs FLDD	WT vs ΔC2	FLDD vs ΔC2
p value		ns = 0.1623	ns = 0.8771	ns = 0.1513
95% confidence interval of difference		-0.3133 to 0.05430	-0.1320 to 0.1541	-0.05353 to 0.3346
