# Supplementary material for: Structural basis for interdomain communication in SHIP2 providing high phosphatase activity
Source: eLife. 2017 Aug 9;6:e26640. doi: 10.7554/eLife.26640 (PMC5550278; doi:10.7554/eLife.26640)
Supplement: Figure 8—source data 1. — Values are pAkt/totalAkt intensities, scaled relative to empty vector (-).The values in red were excluded. Numbers (#i) above data indicate independent experiment number. p-Values are calculated using a two-tailed unpaired Student t test assuming Gaussian distribution. Exact p-values are shown if >0.001. *Replicas from experiment #2 were loaded on different gels and scaled relative to empty vector (i.e. all scale to 1). Therefore empty vector values of experiment #2 are excluded in the statistical evaluation. DOI: http://dx.doi.org/10.7554/eLife.26640.030 [file elife-26640-fig8-data1.xlsx]

## Sheet: Sheet1
Figure 8-source data
The values in red were excluded
Numbers (#i) above data indicate independent experiment number
Values are pAkt/totalAkt intensities, scaled relative to empty vector (-)
SHIP2		#1			#2			#3			#4			#5			#6			#7			#8
-	0.992521	1.13131	0.876171	1*	1*	1*	0.968946	1.20213	0.828924	0.939185	1.12979	0.931023	0.920952	1.1868	0.892249	0.892873	1.169	0.938125	0.79255	1.14388	1.06357	0.776182	1.37056	0.853261
WT	0.572823	0.865435	0.558448	0.646679	0.653381	0.692043	0.652688	0.705665	0.764136	1.07589	0.765296	0.570156	0.920423	0.916113	0.675958	0.794082	0.868957	0.678804	0.590693	0.830271	0.759118	0.632644	0.790531	0.729074
FLDD	0.637941	0.706395	0.607007	0.801527	0.892624	1.49293	0.75166	1.01191	0.84913	0.679229	0.606136	0.669969	1.18402	1.19203	1.31583	0.771379	0.918427	0.799251	0.552318	0.678336	0.784069	0.734821	0.600498	0.804185
DC2	0.862072	1.19294	0.837132	0.999575	1.12393	1.27612	1.08766	1.3592	0.840768	0.94218	0.889112	0.982058	1.10415	1.20549	1.47349	1.17527	0.954677	1.10062	0.801883	0.925983	0.990479	1.06012	0.81244	1.06142
*Replicas from experiment #2 were loaded on different gels and scaled relative to empty vector (i.e. all sclae to 1). Therefore empty vector values of experiment #2 are excluded in the statistical evaluation.
Statistical unpaired t-test analysis for figures 8
Contructs compaired		J vs WT	WT vs FLDD	WT vs ΔC2
p value		❋❋❋❋	❋= 0.0369	❋❋❋❋
95% confidence interval of difference		0.1957 to 0.3640	-0.2376 to -0.02827	-0.4165 to -0.2370
