# Supplementary material for: Structural basis for interdomain communication in SHIP2 providing high phosphatase activity
Source: eLife. 2017 Aug 9;6:e26640. doi: 10.7554/eLife.26640 (PMC5550278; doi:10.7554/eLife.26640)
Supplement: Supplemental file 1. — Tm values are determined by thermofluor. NA, not analyzed; WS, weak signal. DOI: http://dx.doi.org/10.7554/eLife.26640.035 [file elife-26640-fig1.xlsx]

## Sheet: Sheet1
Supplemental file 1
		Ptase (°C)				Ptase-C2 (°C)
	1	2	3	mean	1	2	3	mean
WT	30.2	30.9	30.7	30.6±0.4	48.5	48.5	48.4	48.5±0.1
FLDD	37.7	39	39.3	38.7±0.9	37.9	39.6	39.5	39.0±1.0
R649A	33.8	34	33.5	33.8±0.3	49.1	49.4	49.4	49.3±0.2
R691A	NA	NA	NA	NA	WS	WS	WS	WS
D613A, D615A	NA	NA	NA	NA	39.7	39.6	39.4	39.6±0.2
R682A	34	35.4		34.7	49.3	49	48.2	48.8±0.6
N684A	WS	WS	WS	WS	47.7	48.2	48	48.0±0.3
R665A	WS	WS	WS	WS	47.9	47.9	47.7	47.8±0.1
D607A	NA	NA	NA	NA	47.9	47.8	47.9	47.9±0.1
Supplemental table 1. Thermal melting (Tm) of SHIP2 WT and mutants.
Tm values are determined by thermofluor. NA, not analyzed; WS, weak signal.
