# Supplementary material for: Structural basis for interdomain communication in SHIP2 providing high phosphatase activity
Source: eLife. 2017 Aug 9;6:e26640. doi: 10.7554/eLife.26640 (PMC5550278; doi:10.7554/eLife.26640)
Supplement: Table 2—source data 1. — All values are [PO4] (in μM). Numbers (#i) above data indicate independent experiment number. Most kinetic parameters (kcat, KM) are extracted from curves shown in Figure 3, for which source data are available with this figure. Below source data are shown for cases where experiments were repeated at higher enzyme concentration (400 nM) to extract reliable kinetic parameters. Equation used to extract Vmax and KM: Y = Bo + Vm*X/(X + KM); Variables: Vmax, KM, Bo = baseline. Software used: Graphpad Prism. DOI: http://dx.doi.org/10.7554/eLife.26640.013 [file elife-26640-table2-data1.xlsx]

## Sheet: Sheet1
Table 2-source data
Most kinetic parameters (Kcat, Km) are extracted from curves shown in Fig.3, for which source data is available with this figure. Below source data is shown for cases where experiments were repeated at higher enzyme concentration (400 nM) to extract reliable kinetic parameters.
All values are [PO4] (in μM).
Numbers (#i) above data indicate independent experiment number
Equation used to extract Vmax and Km: Y=Bo + Vm*X/(X+Km); Variables: Vmax, Km, Bo=baseline. Software used: Graphpad Prism.
	Ptase (400 nM)
[PIP3diC8] (mM)		#1			#2			#3
0.222222	26.7465	29.3737	25.0583	28.6103	23.0921	22.3136	23.8378	28.1638	21.7573
0.148148	23.882	23.6774	25.0581	24.4618	23.5052	25.3168	20.75	22.8635	21.729
0.098765	25.084	27.5781	22.4346	22.3285	23.3041	22.5453	22.2096	22.4081	20.6607
0.065844	21.5359	21.1965	19.82	21.5623	17.2358	20.218	17.5954	20.2933	16.7826
0.043896	15.2049	19.6073	18.1153	18.3738	16.6087	15.8492	13.1895	14.7887	14.6639
0.029264	14.2911	14.4731	11.7572	10.1139	13.172	12.1499	11.4681	12.8329	13.395
0.0195093	8.46257	9.9812	9.05255	7.16047	5.76334	6.12948	9.72483	8.25573	8.7625
0.0130062	5.6035	7.53151	5.06586	5.0062	4.50083	3.23503	5.49028	4.41516	3.696
0.00867082	3.80075	4.80739	3.74078	2.7808	1.90138	1.92354	4.28496	3.82311	4.46969
0	0.678818	0.43201	0.924586	-0.468132	0.0695163	0.98026	-1.10317	-0.968073	-0.545815
	Ptase_R649A (400 nM)
[PIP3diC8] (mM)		#1
0.222222	51.3721	46.6758	44.0804
0.148148	49.0486	39.2132	43.5429
0.098765	42.3414	38.5003	37.3005
0.065844	38.6162	30.0885	31.5916
0.043896	27.6738	23.3886	26.7817
0.029264	20.9986	20.7893	18.856
0.0195093	12.2376	12.0287	10.6309
0.0130062	7.97072	8.01367	8.03628
0.00867082	4.9744	4.59169	3.89988
0	-0.0386485	-0.463031	0.501679
