# Supplementary material for: Structural basis for interdomain communication in SHIP2 providing high phosphatase activity
Source: eLife. 2017 Aug 9;6:e26640. doi: 10.7554/eLife.26640 (PMC5550278; doi:10.7554/eLife.26640)
Supplement: Table 3—source data 1. — All values are [PO4] (in μM). Numbers (#i) above data indicate independent experiment number. Most kinetic parameters (kcat, KM) are extracted from curves shown in Figure 6, for which source data are available with this figure. Below source data are shown for cases where no curve is shown or where experiments were repeated at higher enzyme concentration (400 nM) to extract reliable kinetic parameters. Equation used to extract Vmax and KM: Y = Bo + Vm*X/(X + KM); Variables: Vmax, KM, Bo = baseline. Software used: Graphpad Prism. DOI: http://dx.doi.org/10.7554/eLife.26640.028 [file elife-26640-table3-data1.xlsx]

## Sheet: Sheet1
Table 3-source data
Most kinetic parameters (Kcat, Km) are extracted from curves shown in Figure 6, for which source data is available with this figure. Below source data is shown for cases where no curve is shown or where experiments were repeated at higher enzyme concentration (400 nM) to extract reliable kinetic parameters.
All values are [PO4] (in μM).
The values in red were excluded
Numbers (#i) above data indicate independent experiment number
Equation used to extract Vmax and Km: Y=Bo + Vm*X/(X+Km); Variables: Vmax, Km, Bo=baseline
	Ptase_R665A (400 nM)
[PIP3diC8] (mM)		#1			#2
0.222222	10.7101	7.72636	8.16427	7.47074	8.18361	8.57885
0.148148	8.31935	9.38121	8.20161	7.31204	7.03619	8.95457
0.098765	12.9366	11.2347	7.4672	7.56107	7.61825	7.15892
0.065844	5.17152	6.95592	5.87675	5.37111	5.82447	6.78209
0.043896	7.73073	5.99949	4.8613	5.18558	5.31943	4.88052
0.029264	5.64505	2.72493	3.1681	5.05866	4.04983	4.34327
0.0195093	2.86907	2.34278	2.33443	3.66475	3.03764	4.18063
0.0130062	1.77268	0.967322	1.11906	1.4133	1.54682	2.60372
0.00867082	1.1015	1.24335	1.19081	1.24131	1.75814	4.73657
0	-0.709362	-0.535373	0.929786	-0.0662453	0.126347	0.254847
	Ptase_R682A (400 nM)			Ptase-C2_R682A (400 nM)
[IP4] (mM)		#1			#1
0.5	3.31789	4.91015	2.7709	9.22899	10.5351	7.14845
0.333333	2.11932	1.60947	2.70741	6.26337	6.98122	7.73187
0.222222	4.38498	2.28134	1.16271	5.41618	7.35036	6.17302
0.148148	1.67941	2.42578	0.685884	4.28175	4.57972	6.21655
0.098765	0.738345	1.6987	1.28198	3.77423	3.67212	4.7257
0.065844	-0.0692367	1.10388	1.11667	1.87507	2.41037	3.43207
0.043896	1.94885	0.607706	0.192518	1.93854	1.94349	2.37915
0.029264	0.0938815	0.616215	0.789413	1.0101	1.76818	11.0022
0.0195093	0.706001	2.67023	0.715741	4.43268	1.36602	2.54212
0.0130062	-0.789981	-1.06941	0.517983	1.3438	0.823355	0.241026
0.00867082	0.934147	0.759428	-0.7263	1.40644	0.890021	0.946645
0	-1.0123	-0.574891	1.58719	0.122014	0.0372336	-0.159248
	Ptase_R682A (50 nM)			Ptase-C2_R682A (50 nM)
[PIP3diC8] (mM)		#1			#1
0.222222	4.36961	3.42	9.00925	9.0249	6.59459	6.3565
0.148148	3.09033	2.45726	3.19368	6.39625	5.97896	7.40465
0.098765	2.9906	4.10244	2.30777	4.44426	5.98077	6.79826
0.065844	2.0151	2.06692	2.56483	5.01669	4.37967	4.93691
0.043896	2.51119	3.73345	2.75293	3.24571	4.32884	3.48665
0.029264	1.70043	0.416037	0.349197	2.41492	1.71932	0.395578
0.0195093	1.92196	1.44524	0.906107	2.23233	3.6289	0.73793
0.0130062	0.318946	0.205583	0.0598298	2.22501	0.304133	1.07761
0.00867082	1.10638	0.368787	1.0631	1.87112	1.50796	1.77866
0	0.554449	-0.127791	-0.426658	-0.0679657	-0.110391	0.178357
